# Supplementary material
Source: PubMed Central journal article supplement (PMC4246953)
Supplement: pnas.201403609SI.pdf [file pnas.201403609SI.pdf]

# Supporting Information

Brindley et al. 10.1073/pnas.1403609111

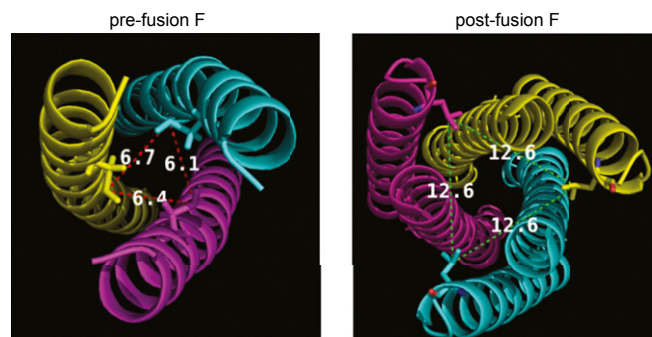

**Fig. S1.** Predicated distances between the sulfur atoms of the engineered cysteines in pre- (Left) and postfusion (Right) models of paramyxovirus fusion (F) protein. Numbers represent measurement in Angstroms; postfusion distances are measured through the core of the central triple helix of the heptad domain adjacent to the F peptide (HR-A).

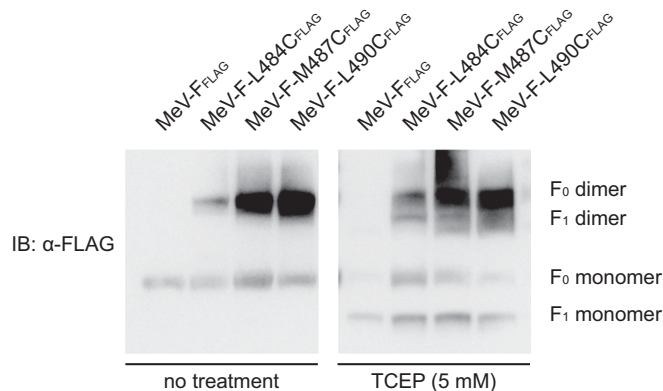

**Fig. S2.** Cell monolayers expressing the viral attachment (H) and F proteins were left untreated or were incubated with 5 mM Tris(2-carboxyethyl)phosphine (TCEP) as in the fusion assay in Fig. 2D. Total cell lysates were harvested with RIPA buffer (composition given in *Materials and Methods*) and analyzed through nonreducing SDS/PAGE. The TCEP treatment conditions were designed to be sufficient to reduce a portion of the dimeric surface-expressed F proteins but not to reduce completely all disulfide bonds of proteins present at the cell surface. Higher TCEP concentrations decreased cell-to-cell fusion, presumably because of more complete reduction of endogenous disulfide bonds, and therefore were not applied in this experiment. IB, immunoblot; Mev, Measles virus.

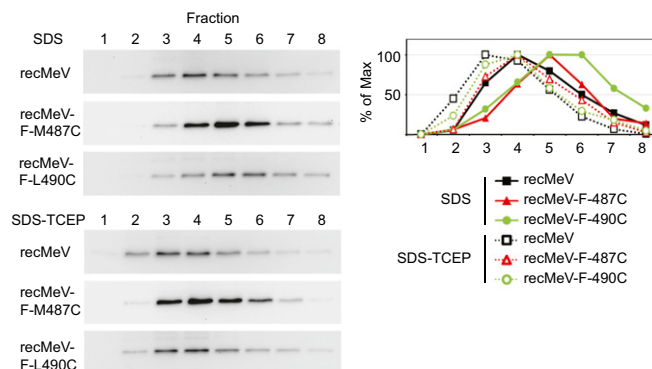

**Fig. S3.** Covalently linked  $F_{\text{cysteine}}$  constructs are incorporated into recombinant MeV (recMeV) virions. (Left) Proteins were extracted from purified particles (SDS) or were extracted and reduced (SDS-TCEP), fractionated on a 1–12% iodixanol (1% per step) gradient, and subjected to immunoblotting using  $\alpha$ -Ftail antiserum. Twelve equal fractions were generated and analyzed. (Right) Densitometric quantifications of the F-protein material in each fraction are shown, normalized for the fraction with the highest F-protein content.





Table S3. Calculations of HR1 (HR-A) and HR2 (HR-B) residue length and HR1/HR2 interface length for a variety of class I viral fusion proteins originating from different viral families

| Protein Data |           |                        | Residues in | Residues in | Ratio        | Length of           |
|--------------|-----------|------------------------|-------------|-------------|--------------|---------------------|
| Bank ID code | Virus     | Viral family           | HR1 (HR-A)  | HR2 (HR-B)  | HR1/HR2      | HR2 (HR-B) helix, Å |
| 1MOF         | MoMLV     | $\gamma$ -Retroviridae | 33          | 0           | ND           | 0                   |
| 2XZ3         | BLV       | $\delta$ -Retroviridae | 52          | 8           | 6.5          | 12                  |
| 1MG1         | HTLV-1    | $\delta$ -Retroviridae | 46          | 8           | 5.75         | 12                  |
| 4JPR         | ASLV      | $\alpha$ -Retroviridae | 39          | 16          | 2.44         | 24                  |
| 4JF3         | MPMV      | Retroviridae           | 47          | 22          | 2.14         | 33                  |
| 1JEK         | Visna     | lenti-Retroviridae     | 39          | 33          | 1.18         | 49.5                |
| 2G2K         | MARV      | Filoviridae            | 41          | 15          | 2.73         | 22.5                |
| 2EBO         | EBOV      | Filoviridae            | 36          | 14          | 2.57         | 21                  |
| 3MKO         | LCMV      | Arenaviridae           | 48          | 14          | 3.43         | 21                  |
| 4C53         | Guanarito | Arenaviridae           | 44          | 16          | 2.75         | 24                  |
| 2IEQ or 1ZV8 | SARS      | Coronaviridae          | 49          | 32 or 20    | 1.53 or 2.45 | 48 or 30            |
| 4MOD         | MERS      | Coronaviridae          | 42          | 17          | 2.47         | 25.5                |
| 3KPE or 3RRT | RSV       | Paramyxoviridae        | 49          | 32          | 1.53         | 48                  |
| 3MAW         | NDV       | Paramyxoviridae        | 65          | 26          | 2.5          | 39                  |
| 1SVF         | SV5       | Paramyxoviridae        | 60          | 26          | 2.31         | 39                  |
| 1ZTM         | hPIV3     | Paramyxoviridae        | 66          | 27          | 2.44         | 40.5                |
| 1WVP7        | NiV       | Paramyxoviridae        | 34          | 28          | 1.21         | 42                  |
| 1WVP8        | HeV       | Paramyxoviridae        | 32          | 26          | 1.23         | 39                  |
| 2FYZ         | MuV       | Paramyxoviridae        | 52          | 26          | 2            | 39                  |

Protein Data Bank ID codes for the individual fusion cores are specified. ND, not determined because of the disorder of the HR2 domain in the crystal structure.
